1            *A deep learning algorithm to translate and classify cardiac*  
2            *electrophysiology: From induced pluripotent stem cell-derived*  
3            *cardiomyocytes to adult cardiac cells*

4  
5        Parya Aghasafari PhD<sup>1</sup>, Pei-Chi Yang PhD<sup>1</sup>, Divya C. Kernik PhD<sup>2</sup>, Kauho Sakamoto PhD<sup>4</sup>, Yasunari  
6            Kanda PhD<sup>5</sup>, Junko Kurokawa PhD<sup>4</sup>, Igor Vorobyov PhD<sup>1,6</sup> and Colleen E. Clancy PhD<sup>1,3</sup>

7  
8        <sup>1</sup>Department of Physiology and Membrane Biology  
9        University of California Davis, Davis, CA

10  
11        <sup>2</sup> Washington University in St. Louis

12  
13        <sup>4</sup>Department of Bio-Informational Pharmacology  
14        School of Pharmaceutical Sciences  
15        University of Shizuoka  
16        Shizuoka, Japan

17  
18        <sup>5</sup>Division of Pharmacology  
19        National Institute of Health Sciences  
20        Kanagawa, Japan

21  
22        <sup>6</sup>Department of Pharmacology  
23        University of California, Davis, CA

24  
25        <sup>3</sup> Correspondence: Colleen E. Clancy, Ph.D.

26        University of California, Davis

27        Tupper Hall, RM 4303

28        Davis, CA 95616-8636

29        Email: [ceclancy@ucdavis.edu](mailto:ceclancy@ucdavis.edu)

30  
31        Phone: 530-754-0254

32        Word count:

33        Subject code: Artificial Intelligence, Machine Learning, Deep Learning, Computational Biology,  
34        Arrhythmias, Pharmacology.

35        Short title: Translation of cardiac action potential from immature to mature

36 **Abstract**

37 The development of induced pluripotent stem cell-derived cardiomyocytes (iPSC-CMs) has been a  
38 critical in vitro advance in the study of patient-specific physiology, pathophysiology and  
39 pharmacology. We designed a new deep learning multitask network approach intended to address  
40 the low throughput, high variability and immature phenotype of the iPSC-CM platform. It was  
41 trained using simulated action potential (AP) data and applied to classify cells into the drug-free  
42 and drugged categories and to predict the impact of electrophysiological perturbation across the  
43 continuum of aging from the immature iPSC-CMs to the adult ventricular myocytes. The phase of  
44 the AP extremely sensitive to perturbation due to a steep rise of the membrane resistance was  
45 found to contain the key information required for successful network multitasking. We also  
46 demonstrated successful translation of both experimental and simulated iPSC-CM AP data  
47 validating our network by prediction of experimental drug-induced effects on adult cardiomyocyte  
48 APs by the latter.

## 49 Introduction

50 The development of novel technologies has resulted in new ways to study cardiac function and  
51 rhythm disorders [1]. One such technology is the induced pluripotent stem cell-derived  
52 cardiomyocyte (iPSC-CMs) *in vitro* model system [2]. The iPSC-CM system constitutes a powerful  
53 *in vitro* tool for preclinical assessment of cardiac electrophysiological impact and drug safety  
54 liabilities in a human physiological context [3-8]. Moreover, because iPSC-CMs can be cultured  
55 from patient specific-cells, it has shown to be an ideal model system for patient-based medicine  
56 [8-10].

57

58 While utilization of *in vitro* iPSC-CMs allows for testing of responses to drugs and understanding  
59 physiological mechanisms [11-14], there is still a major inherent limitation of the approach: The  
60 complex differentiation process to create iPSC-CMs results in a model of cardiac electrical behavior  
61 that resembles fetal cardiomyocytes. Hallmarks of the immature phenotype include spontaneous  
62 beating, immature calcium handling, presence of developmental currents, and significant  
63 differences in the relative contributions of repolarizing potassium currents compared to adult  
64 cardiomyocytes (adult-CMs) [15-17]. The profound differences between the immature iPSC-CMs  
65 and the adult-CMs have led to persistent questions about the utility and applicability of the iPSC-  
66 CM action potential (AP) to predict relevant drug impacts on adult human electrophysiology [18,  
67 19].

68

69 Several recent studies have proposed computational frameworks to address the primary limitation  
70 in using iPSC-CMs and animal cardiomyocytes for drug screening [11, 12, 20, 21]. The innovative  
71 studies described by Tvieta and colleagues [9, 10] presented a translation algorithm that identified  
72 a mapping function to identify the relationships between the parameters that are defined by key  
73 ion channel conductances in the iPSC-CM APs and the adult-CM APs. In another study by Gong  
74 and Sobie, additional insights were revealed through application of an efficient partial least  
75 squares regression (PLSR) methodology to translate key physiological features between iPSC-CMs  
76 and adult-CMs. They also demonstrated the potential to translate between species, between drug-  
77 free and simple drugged models as well as between healthy and diseased phenotypes [20].

78 Koivumäki et al. also tried to address the problem of iPSC-CMs immaturity by establishing a novel  
79 *in silico* mathematical model for iPSC-CMs, which can estimate adult-CM behavior [22].

80

81 The efficacy of the linear translation algorithms used in the earlier studies relies on a collection of  
82 underlying assumptions [20]. One described by Tvieta et al. is that cardiac protein expression levels  
83 would differ but their functional properties remain invariant during maturation and that a drug  
84 will modify protein function in the same way for iPSC-CMs and the adult-CMs [11]. Tvieta et al.  
85 also acknowledged the difficulty in minimizing the cost function that measures the differences  
86 between the initial and target parameters, which therefore required a brute force search  
87 algorithm for minimization. One possible explanation for the difficulty in cost function  
88 minimization is that linear translation may not capture the nonlinearities comprising the actual  
89 underlying physiological differences [20]. Another underlying assumption with linear translation is  
90 the required representation of drug effects as a simple pore-block, modeled as a reduction in the  
91 maximal conductance of the channel [11, 20]. The earlier studies employed a biased method in  
92 that they rely on *a priori* parameter identification and extraction from voltage and calcium traces  
93 to allow feature mapping from immature to mature conditions [11, 20]. Earlier translators must  
94 also consider drug-free and drugged conditions independently.

95

96 In this study, we describe a deep learning multitask network that simultaneously performs  
97 translation and classification of signals from simulated cardiac myocytes for both drug-free and  
98 drugged conditions and we demonstrate its utility for translating and predicting experimental data  
99 as well. The multitask network is an unbiased approach in that the user does not predefine the  
100 important parameters of the system. Rather, the network learns from the data to define important  
101 parameter regimes and data ranges. The new approach is indifferent to the underlying form of the  
102 models and can translate time series data from any source. Moreover, the deep learning approach  
103 accepts non-linearity of the system, makes no assumptions about changes in cardiac protein  
104 expression and function during maturation and can successfully translate simple pore block and  
105 complex conformation state-dependent channel – drug interaction. The network learns from all  
106 of these data sources for robust and successful translation, suggesting broad applicability.

107 Artificial neural networks are increasingly used to advance personalized medicine [23-27]. Long-  
108 short-term-memory (LSTM) based networks, which are capable of learning order dependence in  
109 sequence prediction problems [28], have been widely used for cardiac monitoring purposes [29-  
110 31]. They have been used to extract important biomarkers from raw ECG signals [32-34] and help  
111 clinicians to accurately detect common heart failure biomarkers in ECG screenings [32, 35-39].  
112 LSTM networks, which can catch existing temporal information in the electronic health records  
113 (EHR), have been highlighted as the best predictive models using real time data [40]. LSTM based  
114 classifiers have also empowered early arrhythmia detection by automatically classifying  
115 arrhythmias using ECG features [41-45]. In addition, deep learning algorithms have been employed  
116 to predict drug-induced arrhythmogenicity associated with blockade of the delayed rectifier  $K^+$   
117 channel current ( $I_{Kr}$ ) in the CMs encoded by human ether-à-go-go-related gene (hERG) [46] for  
118 sets of small molecules in drug discovery and screening process [46-51].

119  
120 Here, we implemented a deep learning LSTM based multitask network to classify iPSC-CM AP  
121 traces into drug-free and drugged categories and translate them into adult-CM AP waveforms. To  
122 collect robust realistic simulated data for training the multitask network, we paced simulated  
123 cardiac myocytes with the addition of a physiological noise current at matching cycle lengths for  
124 Kernik *in silico* iPSC-CMs [52] and O'Hara-Rudy *in silico* human adult-CMs [53] to generate a  
125 population of drug-free simulated cardiac myocyte data. To ensure that our model could perform  
126 for both drug-free and drugged iPSC-CM and adult-CM APs simultaneously, we simulated drugged  
127 samples via both a simple drug-induced  $I_{Kr}$  block model of hERG channel conduction,  $G_{Kr}$ , reduction  
128 by 1-50% and a complex Markov model of conformation-state dependent  $I_{Kr}$  block in the presence  
129 of a clinical concentration,  $2.72 \text{ ng/mL}$ , of a potent hERG blocking drug dofetilide from our recent  
130 study [46]. We evaluated the multitask network performance on a test dataset and showed  
131 excellent performance to translate and classify signals in the form of time-resolved AP traces. We  
132 performed an ablation study to reveal the most important iPSC-CM AP information for network  
133 translation into adult-CM APs by removing iPSC-CM AP values during various time frames (feature  
134 ablation). We also explored the importance of individual LSTM network building blocks and how  
135 decoupling of the translation and classification tasks affected overall network performance. We

136 then showed how proposed multitask network can be applied even to scarce experimental data,  
137 which was also used to validate the model.

138

139 In this study we show that developments in iPSC-CM experimental technology and cardiac  
140 electrophysiological modeling and simulation of iPSC-CMs can be leveraged for the application of  
141 artificial neural networks (ANN) as a universal approximator [54] to find the most accurate  
142 mapping function which is capable of learning nonlinear relationships to predict disease  
143 phenotype and drug response in cardiac myocytes from immaturity to maturation.

144

## 145 **Results**

146 In this study, we set out to build a multitask network that would perform two distinct tasks: The  
147 first task is to classify iPSC-CM APs into drug-free and drugged categories. The second goal is to  
148 translate iPSC-CM APs into corresponding adult-CM AP waveforms. To collect the data for training  
149 the multitask network, we simulated a population of 208 AP waveforms for both Kernik *in silico*  
150 human iPSC-CMs [52] (Figure 1E blue) and O'Hara-Rudy *in silico* human adult-CMs [53] (Figure 1F  
151 blue). We ensured consistency across a population of simulated myocytes by applying  
152 physiological noise at the matching the cycle lengths into the iPSC-CMs and adult-CMs. The cell  
153 variability in each population is intended to represent the individual variability that is observed in  
154 a drug-free human population [52, 53, 55]. An average AP trace from the population is shown in  
155 Figure 1A for iPSC-CMs and Figure 1B for adult-CMs. In Figure 1 panels C and D, the ionic currents  
156 underlying the *in silico* iPSC-CM APs and adult-CM APs show marked differences, one reason for  
157 the broadly expressed concerns about the applicability of utilizing immature iPSC-CM APs in the  
158 study of human disease and pharmacology. The substantial current differences illustrate the  
159 necessity of a generalized approach to perform translation from immature myocytes into mature  
160 myocytes. To ensure that our multitask network could perform over a range of conditions and  
161 model forms, we simulated drugged iPSC-CM and adult-CM APs via both a simple  $I_{Kr}$  drug block  
162 model of  $G_{Kr}$  reduction by 1-50% (250 samples in Figure 1E, F green) and a complex model of  
163 conformation-state dependent  $I_{Kr}$  block in the presence of 2.72 ng/mL dofetilide (300 samples in  
164 Figure 1E, F purple). We combined the drug-free and drugged models with simple and complex  $I_{Kr}$

165 block model schemes (758 samples) for training the multitask network. The differences in key  
166 parameters, upstroke velocity ( $V_{\max}$ ), maximum diastolic potential (MDP) and action potential  
167 durations (APD) across the three conditions are tabulated and shown in Figure 1G.

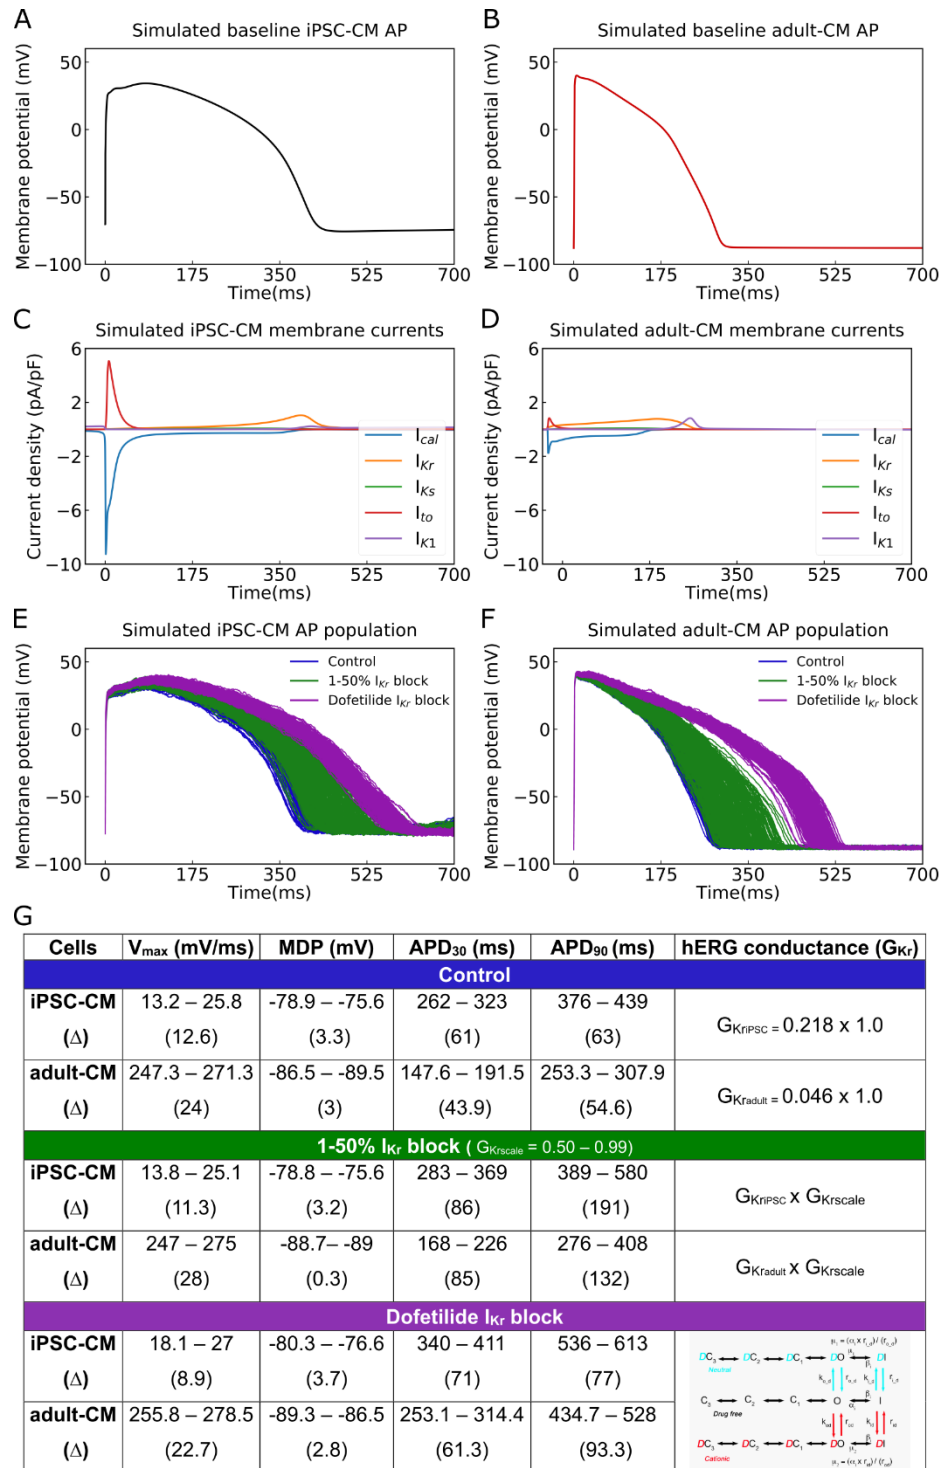

168 **Figure 1.** Cellular action potential (AP) and ionic currents for iPSC-CMs and adult-CMs (O’Hara-  
 169 Rudy human ventricular action potentials). Comparison of Cellular APs in the baseline model of  
 170 (A) iPSC-CMs and (B) adult-CMs at a matched cycle length of 982 ms. (C – D) Simulated ionic  
 171 current ( $I_{CaL}$ ,  $I_{Kr}$ ,  $I_{Ks}$ ,  $I_{to}$ ,  $I_{K1}$ ) profiles during (C) iPSC-CM and (D) adult-CM APs. (E) APs of



172 spontaneously beating iPSC-CM cells ( $n = 208$ ) and (F) adult-CM APs at matched cycle lengths  
173 were simulated after incorporating physiological noise currents as drug-free (blue) and drugged  
174  $I_{Kr}$  modeled as simple  $G_{Kr}$  reduction by 1-50%  $I_{Kr}$  block (green) and a complex model of  
175 conformation-state dependent  $I_{Kr}$  block in the presence of 2.72 ng/mL dofetilide (purple). (G)  
176 Comparison between iPSC-CM and adult-CM drug-free and drugged models with simple and  
177 complex  $I_{Kr}$  block model schemes (as indicated in right column), including upstroke velocity  
178 ( $V_{max}$ ), maximum diastolic potential (MDP) and action potential duration (APD).  
179

180 Next, we applied a digital forward and backward data filtering technique [56] to the simulated  
181 iPSC-CM and adult-CM AP traces (Figure 2 left panels). Since we applied physiological noise to  
182 introduce a source of variability (as observed in human populations) in our model simulations, we  
183 assessed the possible phase distortion for AP waveforms following noise filtering. In Figure 2 (right  
184 panels), the distribution of iPSC-CM and adult-CM AP duration at 90% repolarization (APD<sub>90</sub>) values  
185 are shown. The near superimposition of the histogram distributions assures that noise filtering  
186 does not change the AP waveform morphology or time course and primarily removes existing  
187 vertical noises. Panel A and B show simulated drug-free iPSC-CM and adult-CM APs and  
188 corresponding APD<sub>90</sub> distribution with physiological noise in blue and after applying the noise  
189 filtering technique in black for iPSC-CM APs and red for adult-CM APs. The same plots are  
190 illustrated for drugged AP traces with simple 1-50%  $I_{Kr}$  block (Figure 2C and D) and with complex  
191  $I_{Kr}$  block model in the presence of 2.72 ng/mL dofetilide (Figure 2E and F). Next, we normalized  
192 drug-free and drugged noise-filtered iPSC-CM APs and adult-CM APs to use them as input and  
193 output, respectively, for training the multitask network.

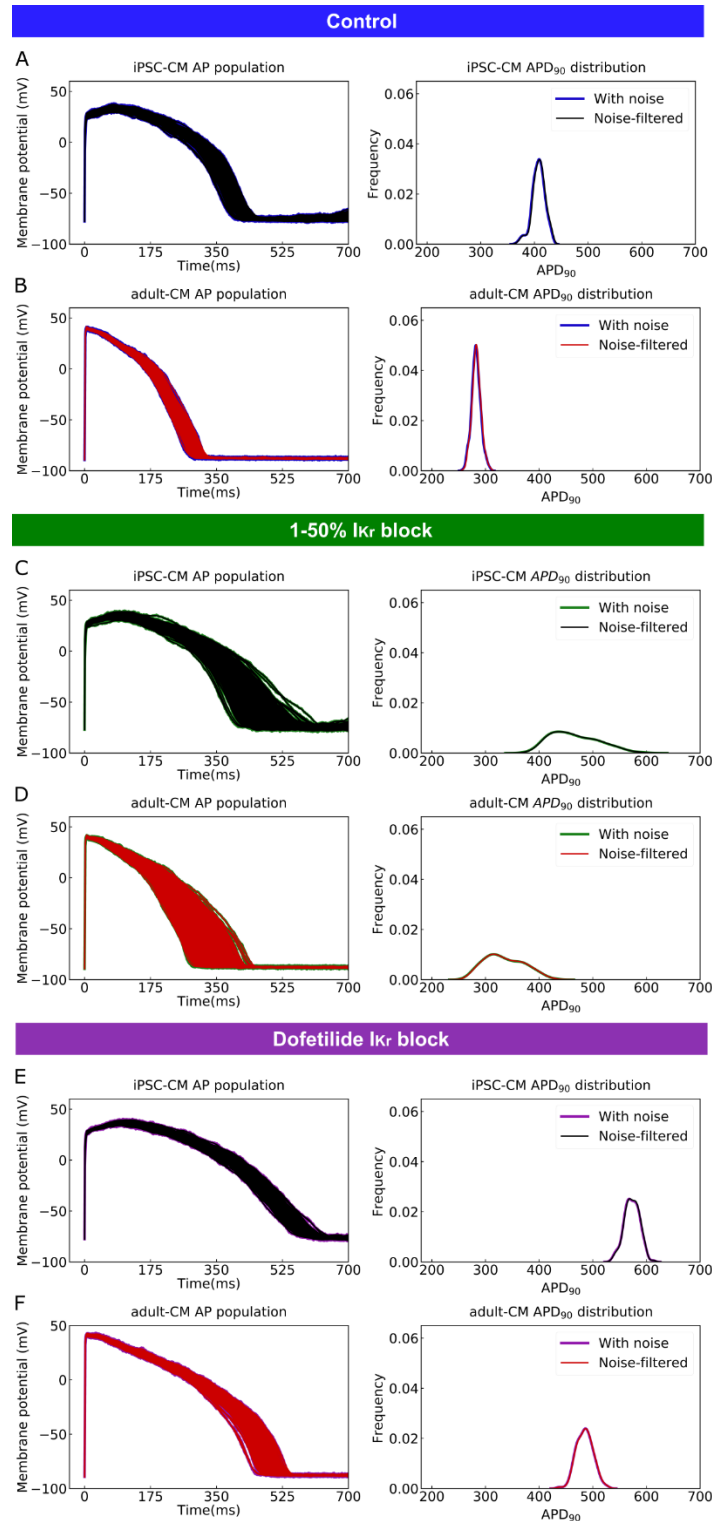

194 Figure 2. Application of a digital forward and backward data filtering technique to simulated  
 195 iPSC-CM and adult-CM APs population (left panels) indicates zero phase distortion for APD<sub>90</sub>  
 196 value distributions (right panels) for: (A) drug-free iPSC-CM APs with physiological noise in blue  
 197 and after applying the noise filtering technique in black; (B) drug-free adult-CM APs – blue and  
 198 red traces; (C) drugged iPSC-CM APs with 1-50% I<sub>Kr</sub> block – green and black traces; (D) drugged

199 adult-CM APs with 1-50%  $I_{Kr}$  block – green and red traces; (E) drugged iPSC-CM APs with 2.72  
200 *ng/mL* dofetilide – purple and black traces. (F) drugged adult-CM APs with 2.72 *ng/mL* dofetilide  
201 –purple and red traces.

202 The building blocks of the multitask network are illustrated in Figure 3A. The multitask network  
203 receives preprocessed simulation generated iPSC-CM AP waveforms (noise-filtered and  
204 normalized) as input and scans whole AP time series values through two stacked LSTM layers  
205 (Figure 3A, D). The LSTM layers remember the most important iPSC-CM AP values (features) they  
206 need to perform the translation and classification tasks and passes the information to two fully  
207 connected layers (Figure 3A, E), one for the translation task to predict the corresponding adult-  
208 CM AP waveform (Figure 3B) and one for the classification task to classify iPSC-CM APs into drug-  
209 free and drugged categories (Figure 3C).

210

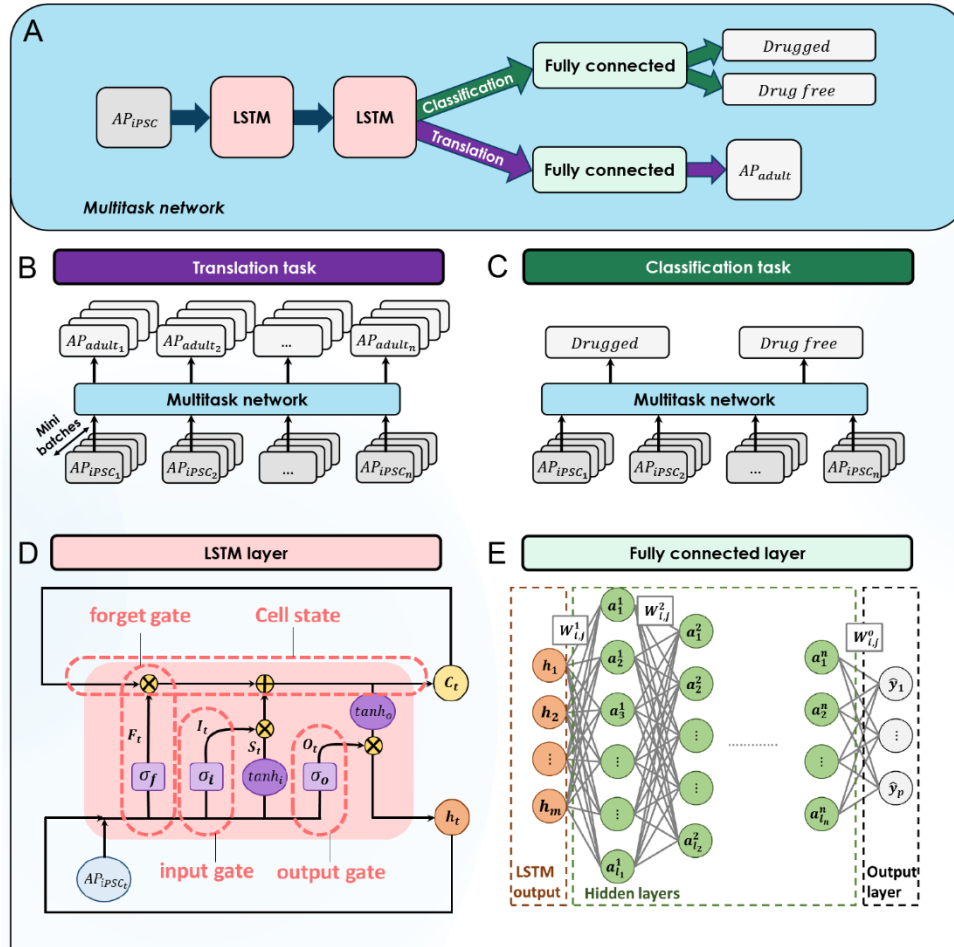

211 **Figure 3.** The building blocks of the multitask network. (A) The general overview of the multitask  
 212 network presented in this study. (B) The translation task to reconstruct adult-CM APs from  
 213 corresponding iPSC-CM APs. (C) The classification task to classify iPSC-CM APs into drug-free and  
 214 drugged categories. (D) The logic flow process in the LSTM layers. (E) The architecture of the  
 215 implemented fully connected layers in the multitask network.

216

217 The workflow for training and evaluating the multitask network is depicted in Figure 4. As  
 218 described above, we generated simulated drug-free and drugged iPSC-CM and adult-CM APs and  
 219 applied a noise filtering technique to the AP waveforms. The waveforms were then normalized in  
 220 a data preprocessing step for more efficient training of the multitask network. We used  
 221 preprocessed iPSC-CM APs as the network input and adult-CM APs along with corresponding drug-  
 222 free and drugged labels as network outputs, respectively. Next, we randomly split input and output  
 223 data in 70:10:20 ratio into three subcategories: training, validation, and test data sets. We used  
 224 the training dataset for training the multitask network to simultaneously perform translation and

225 classification. The mean squared error,  $R^2$ -score [57] and error in adult-CM APD<sub>90</sub> prediction were  
226 used as evaluation metrics for the translation task. For the classification task, area under the  
227 receiver operating characteristic (AUROC) curve [58], network prediction accuracy, precision and  
228 recall [59] were used to evaluate the network performance. To prevent overfitting, we calculated  
229 the evaluation metrics for both tasks using validation data during each iteration of training and  
230 compared those with values from the training dataset. When the model performance on the  
231 training dataset exhibited degradation relative to the validation dataset, we ceased training and  
232 tuning of the network hyperparameters. We evaluated the underlying mechanisms that inform  
233 the network performance by using a holdout test data set to perform an ablation study. The  
234 ablation study allowed us to identify the most important information for network performance  
235 and is an indicator of the data that the network deems most important to remember to allow  
236 accurate translation into adult-CM APs (feature ablation). Finally, we performed a type of network  
237 component dissection by sequentially eliminating individual LSTM layers or the classification task  
238 to determine if all elements of the network are important to the overall performance.

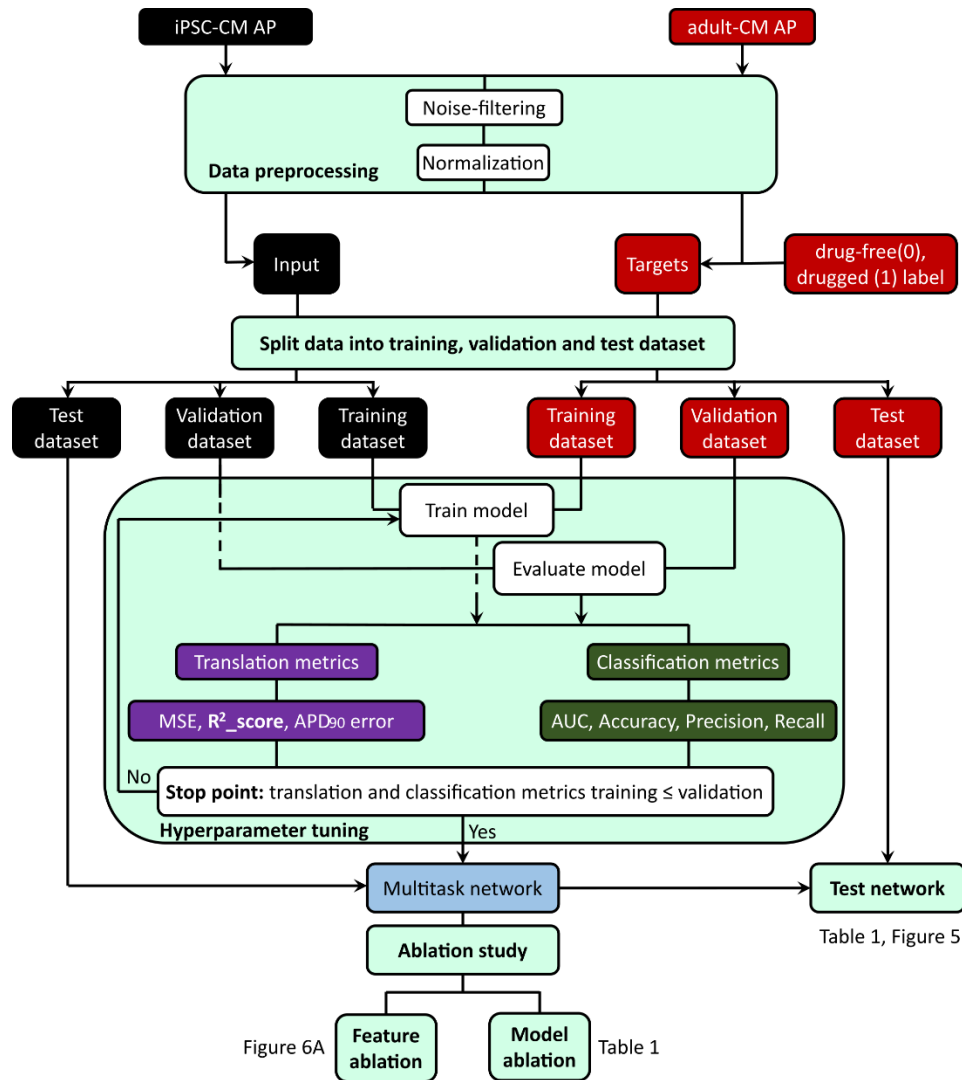

239 **Figure 4.** Machine learning workflow in this study: 1) Data preprocessing includes noise-filtering  
 240 and normalization of the drug-free and drugged iPSC-CM and adult-CM APs; 2) Incorporating the  
 241 preprocessed iPSC-CM APs as input and adult-CM APs and corresponding labels (drug-free (0)  
 242 and drugged (1)) of iPSC-CM APs as targets into the multitask network; 3) Splitting the input and  
 243 target data into training, validation and test set, and using training and validation set for training  
 244 and tuning the network hyperparameters; 4) Comparing the network performance for training  
 245 set and validation set to decide when to stop training and tuning the network hyperparameters;  
 246 5) Testing the overall multitask network performance using holdout test dataset and removing  
 247 the LSTM layers, classification task (model ablation) and iPSC-CM AP values at different time  
 248 frames (feature ablation) to study the performance of the network in the absence of its building  
 249 blocks.

250 Figure 5 and Table 1 illustrate the overall multitask network performance for translation and  
 251 classification tasks for the training and test data sets. Panels A and D in Figure 5 represent iPSC-  
 252 CM APs (black), which were used for training and testing the multitask network, respectively.

253 Panels B and E depict the comparison between simulated (red) and translated (cyan) adult-CM APs  
254 used for the training and testing the network. The comparison between histogram distribution of  
255 APD<sub>90</sub> values for simulated and translated adult-CM APs in Figure 5C and F show good agreement  
256 in terms of the frequency of virtual cells with similar APD.  
257

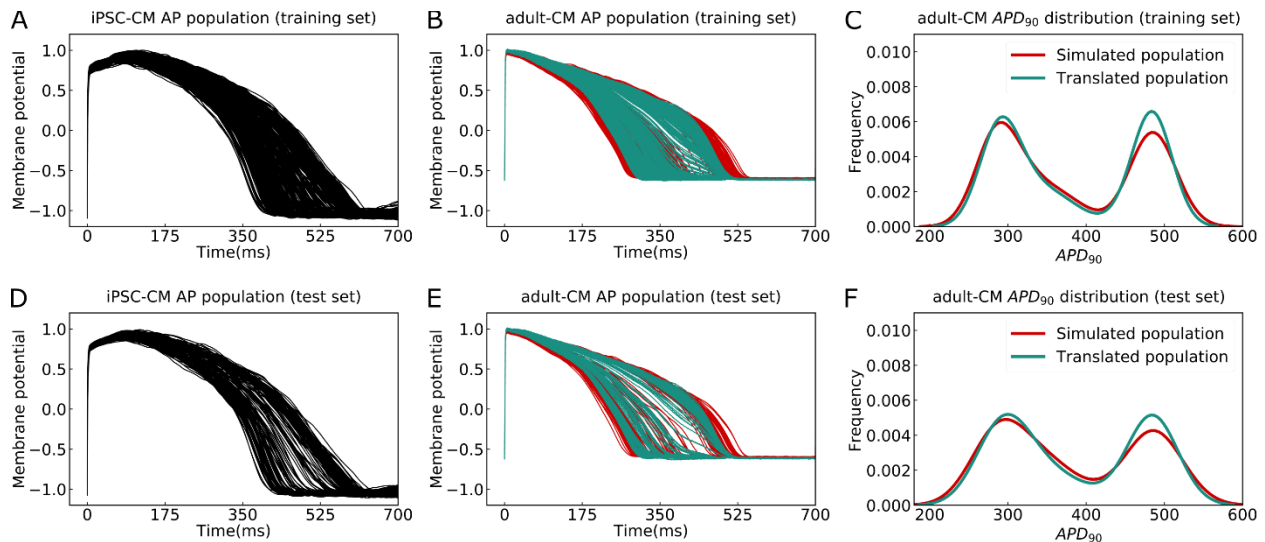

258  
259 **Figure 5.** The performance of the multitask network for translating iPSC-CM APs into adult-CM  
260 APs. (A) The iPSC-CM APs used for training the multitask network contained a variety of drug-  
261 free and drugged action potential morphologies (Training set). (B) Comparison between  
262 simulated (red) and translated adult-CM APs (cyan) in the training set. (C) Comparison between  
263 the histogram distribution of APD<sub>90</sub> values for simulated and translated adult-CM APs in the  
264 training set. (D) Dedicated iPSC-CM APs for testing the performance of the multitask network  
265 (Test set) (E) Comparison between simulated (red) and translated adult-CM APs (cyan) in the test  
266 set. (F) Comparison between histogram distribution of APD<sub>90</sub> values for simulated and translated  
267 adult-CM APs in the test set.

268  
269 The performance evaluation metrics for both the translation and classification tasks are listed in  
270 Table 1. The multitask network exhibits high accuracy in performing translation, despite large  
271 variability in APDs and regardless of the underlying model form. The network is able to translate  
272 iPSC-CM APs into adult-CM APs with less than 0.003 mean-squared error (MSE), 0.99 R<sup>2</sup>\_score and  
273 less than 4% error in APD<sub>90</sub> prediction for both training and test datasets. To evaluate the network  
274 performance for the classification task we compared the AUROC, prediction accuracy, recall and  
275 precision for both training and test datasets. The multitask network proved to perform well in  
276 categorizing iPSC-CM APs into drug-free and drugged waveforms with approximately 90%

277 accuracy (Table 1). Finally, we performed a type of network component dissection by sequentially  
 278 eliminating individual LSTM layers or the classification task to determine if all elements of the  
 279 network are important to the overall performance. The impact of removing these elements of the  
 280 network on the network performance is shown in Table 1.

281  
 282 **Table 1.** Statistical measures for evaluating the performance of the multitask network for both  
 283 iPSC-CM AP trace classification into drug-free and drugged categories and their translation into  
 284 adult-CM APs for training and test datasets as well as the effect of removing LSTM layers and  
 285 classification task on the network performance.

| Translation                                    |        |                       |                                       |           |
|------------------------------------------------|--------|-----------------------|---------------------------------------|-----------|
| Performance metrics                            | MSE    | R <sup>2</sup> _score | Error in APD <sub>90</sub> prediction |           |
| <i>Training dataset</i>                        | 0.0027 | 0.992                 | 3.41%                                 |           |
| <i>Test dataset</i>                            | 0.0029 | 0.991                 | 3.60%                                 |           |
| <i>Remove LSTM layers test dataset</i>         | 0.0031 | 0.991                 | 3.78%                                 |           |
| <i>Remove classification task test dataset</i> | 0.0034 | 0.990                 | 4.33%                                 |           |
| Classification                                 |        |                       |                                       |           |
| Performance metrics                            | AUROC  | Accuracy              | Recall                                | Precision |
| <i>Training dataset</i>                        | 0.93   | 92%                   | 0.92                                  | 0.93      |
| <i>Test dataset</i>                            | 0.91   | 92%                   | 0.92                                  | 0.92      |
| <i>Remove LSTM layers test dataset</i>         | 0.90   | 92%                   | 0.90                                  | 0.91      |

286 Next, we performed a “computational” ablation study as a correlate to the types of physiological  
 287 ablations that are used to examine the roles and functions of a physiological system [60, 61]. We  
 288 tested how the performance of the multitask network would change by removing various  
 289 information contained within specified time frames as shown in Figure 6A. To reveal the most  
 290 important iPSC-CM AP information for translation into adult-CM APs, we did not allow the network  
 291 to process data from within designated time frames from the iPSC-CM APs (feature ablation). We  
 292 then retrained the multitask network by setting the missing information equal to zero and  
 293 compared the calculated MSE in adult-CM APs translation (red bars) with the recorded MSE for  
 294 multitask network (green line) when it was provided full access to the complete iPSC-CM AP data.  
 295 We observed that network is extremely sensitive to information contained within the *400-500 ms*  
 296 timeframe (blacked dashed bar in Figure 6A).

297



298 This result suggests that the most important information needed to distinguish adult-CM AP  
 299 signals from iPSC-CM AP signals is contained in a particular region of the AP plateau. The  
 300 timeframe of the AP between 400 and 500 ms (Figure 6A), corresponds to a phase of exquisite  
 301 sensitivity to perturbation. We have identified this particular AP range in an earlier study as the  
 302 phase when the membrane resistance of the myocyte increases markedly (Figure 6B) [62]. This  
 303 occurs as the inward and outward currents balance each other, leading to a net whole cell current  
 304 that is nearly constant so that  $dl \rightarrow 0$ ,  $dV/dl \rightarrow \infty$  (Figure 6C), followed by a rapid reduction in  
 305 outward current. Figure 6D demonstrates that individual current densities have a period of inward  
 306 and outward current balance followed by rapid changes in  $I_{Kr}$  and other repolarizing currents at  
 307 400-500 ms time interval.  
 308

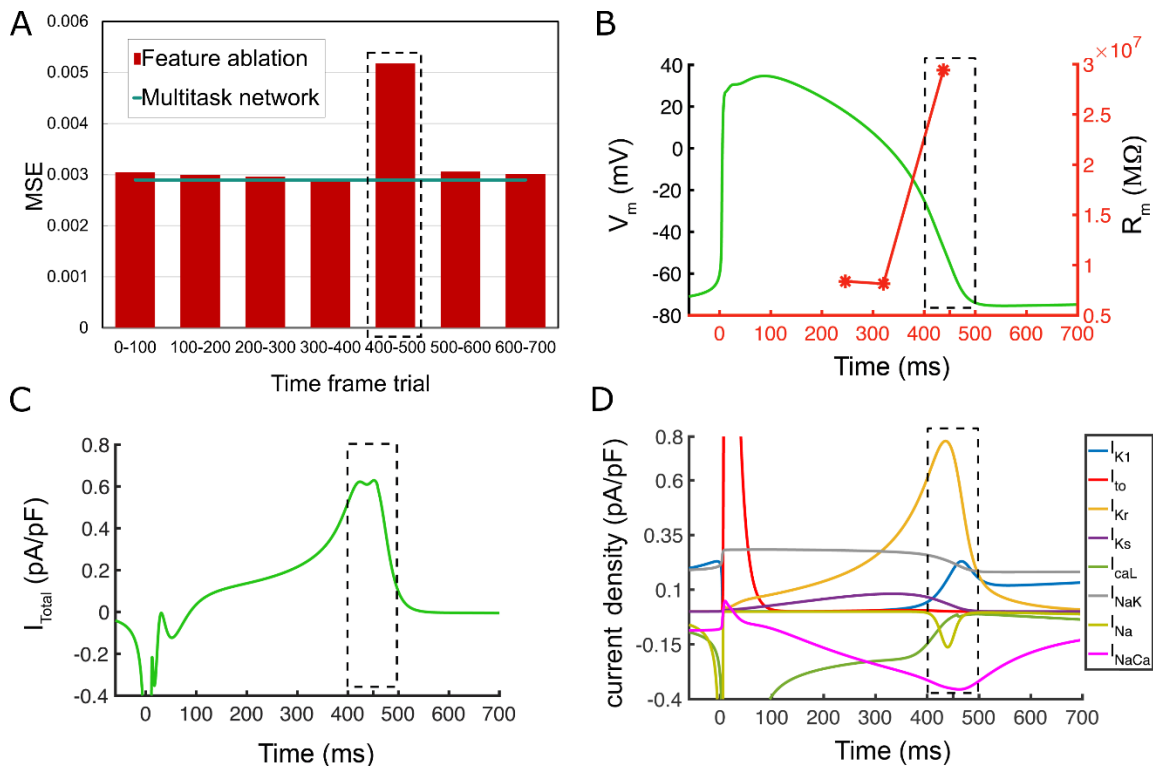

309 **Figure 6.** The feature ablation study on the proposed multitask network is performed by  
 310 removing iPSC-CM AP values during different time frames and evaluating their importance on  
 311 adult-CM AP translation. The largest effect (most important information) is observed at 400-500  
 312 ms interval (dotted black line). (A) Comparison between intact multitask network MSE (cyan line)  
 313 and obtained MSE values for adult-CM AP translation during removal of indicated time frames  
 314 within iPSC-CM APs (red bars). (B) AP trace (green) and membrane resistance (red) as a function  
 315 of simulation time indicating very high values (as  $dl \rightarrow 0$ ,  $dV/dl \rightarrow \infty$ ) for the latter at 400-500

316 *ms.* (C) Total current density,  $I_{total}$ , demonstrates a plateau followed by a rapid decline at 400-500  
317 *ms.* (D) Individual current densities indicate a period of inward and outward current balance  
318 followed by rapid changes in  $I_{Kr}$  and other repolarizing components at 400-500 *ms* time interval.

319  
320 We next set out to demonstrate the real-world utility of the multitask classification and translation  
321 network by applying the network to experimental data. We used experimental iPSC-CM APs from  
322 the Kurokawa lab (Figure 7A) as the input data into the multitask network and translated to  
323 predicted adult-CM APs as shown in Figure 7B. The translation notably resulted in a reduction in  
324 variability in APD in the adult translated cells, consistent with our simulated results and with  
325 previous experimental observations [18, 63]. In an additional validation of the multitask network,  
326 we undertook a test of the network to accurately translate drug block in iPSC-CMs to adult AP  
327 effects and then compared the predicted results with measured experimental data [53]. We first  
328 simulated iPSC-CM APs with 50% block of  $I_{Kr}$ . We then used these simulated APs as an input for  
329 the multitask network and used the output from the translation task to predict 50% block on adult-  
330 CMs. In Figure 7C, the translated drugged APD<sub>90</sub> values are shown as turquoise asterisks plotted  
331 against simulations from O'Hara-Rudy adult-CM APs with 50%  $I_{Kr}$  block (red curve) and  
332 experimental 50% block of  $I_{Kr}$  by 1 $\mu$ M E-4031 (blue squares) [53]. These data validate that the  
333 effects of drug block in iPSC-CMs can be successfully translated to predict its effect on adult human  
334 cardiomyocyte APs.

335

336

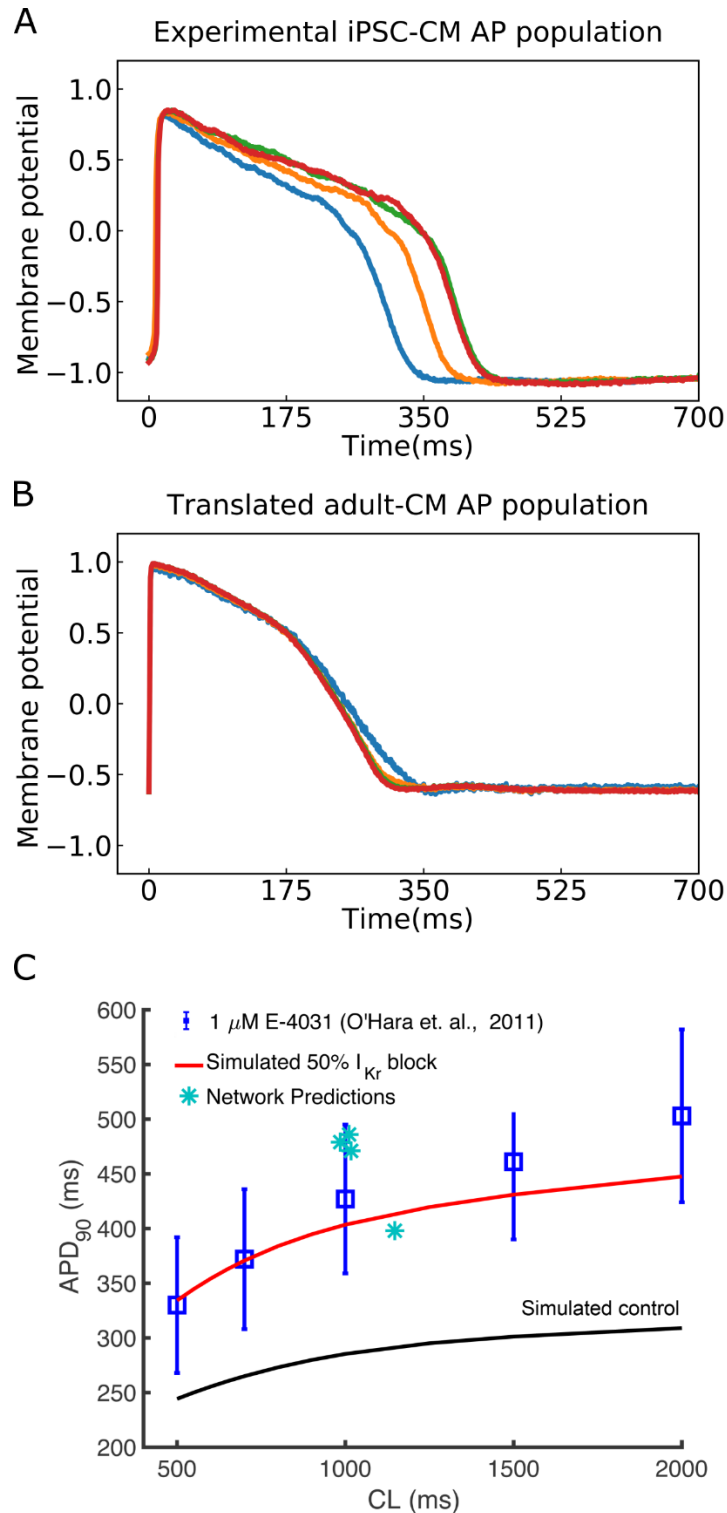

337 **Figure 7.** Translation of experimentally recorded iPSC-CM APs into adult-CM APs to validate the  
338 multitask network performance. (A) Experimentally recorded iPSC-CM APs from the Kurokawa  
339 lab. (B) Translated adult-CM APs from experimentally recorded iPSC-CM APs via the multitask  
340 network. (C) Comparing translated adult-CM APD<sub>90</sub> values with 50% I<sub>Kr</sub> block (turquoise asterisks)

341 with previously published simulated (red curve for drugged and black for drug-free control) and  
342 experimental (blue squares) values from O’Hara-Rudy study [1] indicates model validation.

343

## 344 Discussion

345 In this study, we developed a data-driven deep learning approach to address well known  
346 shortcomings in the induced pluripotent stem cell-derived cardiomyocyte (iPSC-CM) platform. A  
347 concern with iPSC-CM is that the data collection results in measurements from immature action  
348 potentials, and it is unclear if these data reliably indicate impact in the adult cardiac environment  
349 [14, 64-68]. Here, we set out to demonstrate a new way to allow translation of results from the  
350 iPSC-CM to a mature adult cardiac response. The deep learning network also revealed new  
351 mechanisms that are critical to convert iPSC-CM APs to mature adult cardiac APs.

352

353 Application of a deep learning artificial neural network to simultaneously translate and classify  
354 signals from simulated iPSC-CMs for both drug-free and drugged conditions has several key  
355 advantages. Because there is no need for the multitask network user to *a priori* define the  
356 important system parameters, the approach is by definition an unbiased model. A key part of the  
357 “artificial intelligence” is learning from the data to make decisions about which elements of the  
358 data are the most important. Another benefit is the model-agnostic approach in that the learning  
359 network is indifferent to the underlying form of the models and can readily translate time series  
360 data from any source. The non-linearity of the system is accepted by the deep learning approach,  
361 and there are no assumptions made about cardiac protein expression levels and changes in their  
362 function during cardiomyocyte maturation. The deep learning artificial neural network can  
363 successfully translate simple pore block and complex conformation state-dependent channel –  
364 drug interaction models. The network can learn from multiple sources of data even when they are  
365 generated from different models and learns from all the data sources concurrently for robust and  
366 successful translation. All of these aspects of the technology presented here suggest broad  
367 applicability for use across ages, species and conditions and we demonstrate its utility for  
368 translating and predicting experimental data.

369

370 The multitask network presented here performed well in the setting of the noted variability in  
371 measurements from iPSC-CM APs. As described in Figure 1, we utilized a modeling and simulation  
372 approach from our recent study [52, 69] to generate a population of iPSC-CM action potentials  
373 that incorporate variability comparable to that in experimental measurements. Utilizing simulated  
374 data presented a unique opportunity: We were able to generate large amounts of data that were  
375 used both to train and optimize the network and then to test the network with specifically  
376 designated distinct simulated data sets. Utilizing simulated data to train a deep learning network  
377 may constitute a widely applicable approach that could be used to train variety of networks to  
378 perform multiple functions where access to comparable experimental data is not feasible.

379  
380 The multitask network exhibits high accuracy in performing translation, despite large variability in  
381 APDs and regardless of the underlying model form (Figure 5 and Table 1). The network was able  
382 to translate iPSC-CM APs into adult-CM APs with less than  $0.003$  mean-squared error (MSE),  $0.99$   
383  $R^2$ \_score and less than  $4\%$  error in  $APD_{90}$  prediction for both the training and test dataset. To  
384 evaluate the network performance for the classification task we compared the AUROC, prediction  
385 accuracy, recall and precision for both training and test datasets. The multitask network proved to  
386 perform well in categorizing iPSC-CM APs into drug-free and drugged waveforms with  
387 approximately  $90\%$  accuracy (Table 1). Finally, we performed a type of network component  
388 dissection by sequentially eliminated individual LSTM layers or the classification task to determine  
389 if all elements of the network are important to the overall performance. The impact of removing  
390 these elements of the network on its performance is shown in Table 1. The studies show that the  
391 multi-task network conferred additional benefit over considering the translation task alone. For  
392 example, we noted that adding the classification task to distinguish drug-free and drugged action  
393 potentials could improve the performance of the translation task (Table 1).

394  
395 When we performed an ablation study to prevent the deep learning network from using  
396 information within prespecified time windows, the results revealed that the most important  
397 information needed to predict adult-CM APs from iPSC-CM AP signals is contained in the phase of  
398 the AP between 400 and 500 ms (Figure 6). This result suggests that the most important

399 information needed to distinguish iPSC-CM AP signals from adult-CM AP signals is contained in the  
400 range of the AP that corresponds to a phase of exquisite sensitivity to perturbation. We have  
401 identified this particular AP range in an earlier study as the phase when the membrane resistance  
402 of the myocyte increases markedly (Figure 6B) [62]. This occurs as the inward and outward currents  
403 balance each other, leading to a net whole cell current that is unchanging ( $di \rightarrow 0$ ,  $dV/di \rightarrow \infty$ ),  
404 followed by a rapid reduction in the outward current (Figure 6C and D).

405  
406 Following the optimization and demonstration of the network as an accurate tool for both  
407 translating and classifying data, we then used the same network to translate experimentally  
408 obtained data. We showed that the proposed network can effectively take experimental data as  
409 an input from immature iPSC-CM APs and translate those data to produce adult action potential  
410 waveforms. It is notable that the variation observed in the adult-CM AP duration is smaller  
411 compared to iPSC-CM APDs (Figure 7A-B). This has been observed both experimentally [18, 63]  
412 and in our simulated cell environment [52, 69]. Although the simulated iPSC-CM has a large initial  
413 calcium current (Figure 1C) compared to the simulated adult-CM (Figure 1D), the amplitude of  
414 currents flowing through adult-CM action potential plateau is notably larger. The immature iPSC-  
415 CM cells have low conductance during the AP plateau rendering it comparably higher resistance.  
416 For this reason, small perturbations to the iPSC-CM APs have a larger impact on the resulting AP  
417 duration than observed in adult cells [62]. We also used simulated iPSC-CM APs subject to 50%  
418 block of  $I_{Kr}$ . We translated those data to adult-CM APs and then compared with the previously  
419 reported impact of 50%  $I_{Kr}$  block on adult human cell APs from experiments [53] and noted  
420 excellent agreement thereby providing validation of our network.

421  
422 In this study, we show that a deep learning network can be applied to classify cells into the drug-  
423 free and drugged categories and can be used to predict the impact of electrophysiological  
424 perturbation across the continuum of aging from the immature iPSC-CM action potential to the  
425 adult ventricular myocyte action potential. We translated experimental immature APs into mature  
426 APs using the proposed network and validated the output of some key model simulations with  
427 experimental data. The multitask network in this study was used for translation of iPSC-CMs to

428 adult APs but could be readily extended and applied to translate data across species and classify  
429 data from a variety of systems. Also, another extension of the technology presented here is to  
430 predict the impact of naturally occurring mutations and other genetic variations [70].

431

## 432 **Methods**

433

### 434 **Simulated data for training and testing the multitask network:**

#### 435 *The drug-free iPSC-CM and adult-CM action potentials*

436 The Kernik *in silico* iPSC-CM baseline cells were paced from resting steady-state. The O’Hara-Rudy  
437 *in silico* endocardial cell model was used for the baseline adult-CMs [53]. The control adult-CMs  
438 were paced at the cycle length of 982 ms to match the cycle length of the last beat of the  
439 spontaneously depolarizing iPSC-CM AP. The iPSC-CM AP populations ( $n = 208$ ) were generated by  
440 incorporating physiological noise (see **Simulated physiological noise currents** section below). The  
441 adult-CMs were paced with noise for 100 beats after reaching steady state at the matching cycle  
442 length of the last beat of iPSC-CM AP populations. The numerical method used for updating the  
443 voltage was Forward Euler method [71].

444

#### 445 *A simple drug-induced 1-50% $I_{Kr}$ block model through $G_{Kr}$ reduction*

446 The iPSC-CMs and the adult-CMs populations were paced with 1-50%  $I_{Kr}$  block with 1% increments.  
447 This was accomplished by scaling down hERG channel ( $I_{Kr}$ ) conduction,  $G_{Kr}$ , by the fraction of the  
448 block,  $G_{Kr\text{scale}}$ , in the 0.50 – 0.99 range with 0.01 decrements (see central rows in Fig. 1G). The  
449 adult-CM model was simulated at five varying beating rates for each percentage of block that  
450 matches to the last beat of iPSC-CMs with 1-50%  $I_{Kr}$  block ( $n = 250$ ). For example, one drugged  
451 adult-CM (50%  $I_{Kr}$  inhibition) was paced at cycle length of 1047 ms to match the cycle length of  
452 the last beat of iPSC-CMs AP with 50%  $I_{Kr}$  block.

453

#### 454 *Complex model of conformation-state dependent $I_{Kr}$ block in the presence of 2.72 ng/mL dofetilide*

455 The  $I_{Kr}$  channel Hodgkin-Huxley model in both iPSC-CM and adult-CM AP models was replaced with  
456 a drug – hERG channel interaction Markov model (see bottom rows in Fig. 1G) that we have

457 previously published [72]. iPSC-CM ( $n = 300$ ) and adult-CM AP populations ( $n = 300$ ) were  
458 generated with physiological noise in the presence of  $2.72 \text{ ng/mL}$  dofetilide, a potent hERG  
459 channel blocker. The adult-CM populations were paced with dofetilide for 100 beats after  
460 reaching steady state at the matching cycle length of the last beat of iPSC-CM AP populations with  
461 dofetilide as described above.

#### 462 **Simulated physiological noise currents:**

463 Simulated noise current was added to the last 100 paced beats in the simulated AP models, and  
464 simulated APs were recorded at the 2000th paced beat in single cells. This noise current was  
465 modeled using the equation from [55],

$$466 \quad V_{t+\Delta t} = V_t - \frac{I(V_t)\Delta t}{C_m} + \xi n \sqrt{\Delta t} \quad (1)$$

467 Where  $n \in N(0,1)$  is a random number from a Gaussian distribution, and  $\Delta t$  is the time step.  $\xi = 0.3$   
468 is the diffusion coefficient, which is the amplitude of noise. The noise current was generated and  
469 applied to membrane potential,  $V_t$ , throughout the last 100 beats of simulated time course.

470

#### 471 **Experimental iPSC-CMs:**

472 Human iPSC-CMs (201B7, RIKEN BRC, Tsukuba, Japan) were cultured and subcultured on *SNL76/7*  
473 feeder cells as described in detail previously [73]. Cardiomyocyte differentiation was performed  
474 as described [73]. Commercially available iCell-cardiomyocytes (FUJIFILM Cellular Dynamics, Inc.,  
475 Tokyo, Japan) were cultured according to the manual provided from the company. Action  
476 potentials were recorded with the perforated configuration of the patch-clamp technique as  
477 described in detail previously [73]. Measurements were performed at  $36 \pm 1 \text{ }^\circ\text{C}$  with the external  
478 solution composed of (in *mM*): *NaCl* (135), *NaH<sub>2</sub>PO<sub>4</sub>* (0.33), *KCl* (5.4), *CaCl<sub>2</sub>* (1.8), *MgCl<sub>2</sub>* (0.53),  
479 glucose (5.5), *HEPES*, *pH 7.4*. To achieve patch perforation (10-20 *MΩ*; series resistances),  
480 amphotericin B (0.3-0.6  $\mu\text{g/mL}$ ) was added to the internal solution composed of (in *mM*): aspartic  
481 acid (110), *KCl* (30), *CaCl<sub>2</sub>* (1), adenosine-5'-triphosphate magnesium salt (5), creatine phosphate  
482 disodium salt (5), *HEPES* (5), *EGTA* (11), *pH 7.25*. In quiescent cardiomyocytes, action potentials  
483 were elicited by passing depolarizing current pulses (2 *ms* in duration) of suprathreshold intensity  
484 (120 % of the minimum input to elicit action potentials) with a frequency at 1 *Hz* unless noted  
485 otherwise.



486 **The multitask network architecture:**

487 The multitask network was comprised of two stacked LSTM layers followed by independent fully  
488 connected layers (Figure 3A) for the classification and translation tasks. The LSTM layers  
489 memorized the important information the network needed to perform two discussed tasks and  
490 then transferred the extracted information (features) into the subsequent fully connected layers  
491 to translate iPSC-CM APs into adult-CM AP waveforms (Figure 3B) and classify iPSC-CM APs into  
492 drug-free and drugged categories (Figure 3C).

493

494 *Long-short term memory (LSTM) layers (Figure 3D):*

495 We used LSTM layers as the first two layers of the multitask network to promote network temporal  
496 information learning which data in a sequence was important to keep or to throw away. At each  
497 time step, the LSTM cell took in three different pieces of information, the current input data  
498 ( $AP_{iPSC_t}$ ), incoming short-term memory (hidden state) ( $h_{t-1}$ ) and incoming long-term memory  
499 (cell state) ( $C_{t-1}$ ). The LSTM layers were responsible for extracting the most important  
500 information while scanning the AP traces using the short- and long-term memory components.  
501 The short-term memory weighted the importance of AP values at subsequent time steps and long-  
502 term memory has been using the short-term memory to decide the overall importance of all AP  
503 values from the beginning ( $t = 0$  ms) to the end ( $t = 701$  ms) for performing classification and  
504 translation tasks. The LSTM cells contained internal mechanisms called gates. The gates were  
505 neural network with weights ( $w$ ) and bias terms ( $b$ ) that regulated the flow of information at each  
506 time step before passing on the long-term and short-term information to the next cell [74]. These  
507 gates are called input gate, forget gate, and output gate (Figure 3D).

508

509 The forget gate, as the name implies, determined which information from the long-term memory  
510 should be kept or discarded. This was done by multiplying the incoming long-term memory by a  
511 forget vector generated by the current input ( $AP_{iPSC_t}$ ) and incoming short-term memory ( $h_{t-1}$ ).  
512 To obtain the forget vector, the incoming short-term memory and current input were passed  
513 through a sigmoid function ( $\sigma_f$ ) [75]. The output vector of sigmoid function,  $F_t$ , (Eq. 2) was a binary

514 comprising 0s and 1s and was then multiplied by the incoming long-term memory ( $C_{t-1}$ ). to  
515 choose, which parts of the long-term memory were retained.

$$516 \quad F_t = \sigma_f(w_f AP_{iPSC_t} + w_f h_{t-1} + b_f) \quad t \in \{0,1, \dots, 701\} \quad (2)$$

517 The input gate decided what new information is being stored in current long-term memory ( $C_t$ ).  
518 It considered the current input ( $AP_{iPSC_t}$ ) and the incoming short-term memory ( $h_{t-1}$ ) and  
519 transformed the values to be between 0 (unimportant) and 1 (important) using a sigmoid  
520 activation function ( $\sigma_i$ ) (Eq. 3). The second layer in input gate took the incoming short-term  
521 memory ( $h_{t-1}$ ) and current input ( $AP_{iPSC_t}$ ) and passed them through a hyperbolic tangent  
522 activation function ( $\tanh_i$ ) to regulate the network computation (Eq. 4).

$$523 \quad I_t = \sigma_i(W_i AP_{iPSC_t} + W_i h_{t-1} + b_i) \quad t \in \{0,1, \dots, 701\} \quad (3)$$

$$524 \quad S_t = \tanh_i(w_s AP_{iPSC_t} + w_s h_{t-1} + b_s) \quad (4)$$

525 The outputs from the forget and input gates then underwent a pointwise addition to find the  
526 current long-term memory ( $C_t$ ) (Eq. 5), which was then passed on to the next cell.

$$527 \quad C_t = F_t * C_{t-1} + I_t * S_t \quad (5)$$

528 Finally, the output gate utilized current input ( $AP_{iPSC_t}$ ) and the incoming short-term memory  
529 ( $h_{t-1}$ ) and passed them into a sigmoid function ( $\sigma_o$ ) (Eq. 6). Then the current long-term memory  
530 ( $C_t$ ) passed through a  $\tanh$  activation function ( $\tanh_o$ ) and the outputs from these two processes  
531 were multiplied to produce the current short-term memory  $h_t$  (Eq. 7).

$$532 \quad O_t = \sigma_o(w_o AP_{iPSC_t} + w_o h_{t-1} + b_o) \quad (6)$$

$$533 \quad h_t = O_t * \tanh_o(C_t) \quad (7)$$

534 The short-term and long-term memory produced by these gates were carried over to the next cell  
535 for the process to be repeated. The output of LSTM layers for each time step ( $h_t$ ) was obtained  
536 from the short-term memory, also known as the hidden state, and was subsequently passed into  
537 fully connected layers to perform the translation and classification tasks as described below.

538

539

540 Fully connected layers (Figure 3E):

541 The fully connected neural network layers contained input, hidden and output layers (Figure 2E)  
542 with various numbers of neurons ( $l_r$ ). Every neuron in a layer was connected to neurons in the  
543 next layer [76]. Fully connected layers received the output of LSTM layers as input. The fully  
544 connected layers calculated a weighted sum of LSTM outputs and added a bias term to the  
545 outputs. These data were then passed to an activation function ( $f$ ) to define the output for each  
546 neuron (Eqs. 8 and 9) [77].

$$547 \quad a_j^k = f(z_j^k) \quad (8)$$

$$548 \quad z_j^k = W_{i,j}^k * a_j^{k-1} + b^k \quad (9)$$

549 Where  $k \in \{1, \dots, n\}$  and  $(i, j)$  represent the number of hidden layers and neurons in each pair of  
550 subsequent hidden layers ( $l_r, l_{r+1}$ ). The optimized values for these parameters were found via  
551 hyperparameter tuning where,  $a^k$  is each neuron output where  $a^0 \in \{h_1, \dots, h_m\}$  is the LSTM  
552 layers output and the input to the fully connected layers and  $a^{n+1}$  is the network output:

553  $\hat{y} \in \{y_{t_i}, y_{c_i}\}$  where  $y_{t_i}$  and  $y_{c_i}$  are the outputs for translation and classification tasks, respectively.

554 We first assigned random values to all network parameters  $\theta_t$ ; each neuron weight ( $W_{i,j}$ ) (Figure  
555 3E), bias term ( $b$ ) which is a constant added to calculate the neurons output and other network  
556 hyperparameters (the number of hidden layers, the number of neurons for each hidden layer and  
557 activation functions for each hidden layer) to start the optimization process for finding the best  
558 network infrastructure. Next, we estimated the network errors using mean squared error, MSE  
559 (Eq. 10) and cross-entropy loss functions (Eq. 11) to map the translation and classification tasks  
560 [54, 78], respectively.

$$561 \quad MSE = \frac{1}{m} \sum_{i=1}^n \|y_{t_i} - \hat{y}_{t_i}\|^2 \quad (10)$$

$$562 \quad CrossEntropy = -(y_{c_i} \log(\hat{y}_{c_i}) + (1 - y_{c_i}) \log(1 - \hat{y}_{c_i})) \quad (11)$$

563 where  $m$  is the total number of LSTM layers outputs ( $h_m$ ) and  $y_{t_i}$  and  $\hat{y}_{t_i}$  are the simulated and  
564 translated adult-CM APs (the network output for translation task). The  $y_{c_i}$  is binary indicator of  
565 class labels for iPSC-CM APs (0 for drug-free or 1 for drugged categories) and  $\hat{y}_{c_i}$  is predicted  
566 probability of APs being classified into the discussed classes. We used sum of both loss functions  
567 (Eq. 12) to calculate the overall network error ( $J$ ) for both translation and classification tasks during

568 the network training process. We updated network parameters ( $\theta_{t+1}$ ) using adaptive momentum  
569 estimation (ADAM) optimization algorithm [79] based on the average gradient of overall loss  
570 function with respect to the network parameters for 64 randomly selected simulated AP traces  
571 (mini-batch = 64) at each training iteration (Eqs. 13-15).

$$572 \quad J(\theta_t) = \text{CrossEntropy}_{\text{Classification}}(\theta_t) + \text{MSE}_{\text{Translation}}(\theta_t) \quad (12)$$

$$573 \quad \theta_{t+1} = \theta_t - \frac{\alpha \cdot \hat{m}_t}{\sqrt{\hat{v}_t + \epsilon}}, \quad \theta_t \in \{W_{i,j}^n, b_j^n\} \quad (13)$$

$$574 \quad \hat{m}_t = \frac{m_t}{1 - \beta_1}, \quad \text{where } m_t = (1 - \beta_1)\nabla J(\theta_t) + \beta_1 m_{t-1} \quad (14)$$

$$575 \quad \hat{v}_t = \frac{v_t}{1 - \beta_2}, \quad \text{where } v_t = (1 - \beta_2)(\nabla J(\theta_t))^2 + \beta_2 v_{t-1} \quad (15)$$

576

577 We used a rectified linear unit (ReLU) [80] as activation function in Eq. 8 to calculate the output  
578 for each hidden layer neuron at each training iteration. We used dropout regularization [81] to  
579 randomly drop neurons with 0.2 probability of elimination along with their connections from the  
580 LSTM and fully connected layers during training to reduce the overfitting. We kept updating the  
581 network parameters using ADAM optimization algorithm (Eq. 13) to find global minimum of loss  
582 function (Eq. 12). We computed the exponential average of the gradient (Eq. 14) as well as the  
583 square of the gradient (Eq. 15) for each parameter ( $\theta_t$ ) where  $\alpha$  is the learning rate equal to 0.001,  
584  $\beta_1, \beta_2$  are first and second momentum coefficients equal to 0.9 and 0.999, and  $\epsilon$  is a small term  
585 equal to  $1e^{-8}$  preventing division by zero.

586

#### 587 **Computational workflow (Figure 4)**

588 We first preprocessed iPSC-CM and adult-CM APs by applying a digital forward and backward data  
589 filtering technique [56] and normalizing the AP values for more efficient training process. Next, we  
590 split the preprocessed data in 70:10:20 ratio into training, validation and test data sets,  
591 respectively, and implemented the network architecture using Pytorch [82]. During the training  
592 process the multitask network received iPSC-CM AP time course data as inputs and predicted  
593 adult-CM AP time courses. The network also received the category (drug-free and drugged) of the  
594 iPSC-CM AP data. The network next calculated the MSE (Eq. 10) between predicted AP waveforms  
595 and the expected waveforms for adult-CM APs. It also calculated cross-entropy (Eq. 11) between  
596 the predicted category for the iPSC-CM AP and the expected value. The cross-entropy was added

597 to the calculated MSE to determine the total loss for training. The ADAM optimization algorithm  
598 was then used to update the network weights and bias terms.

599

600 We performed updating the network parameters (Eq. 13) and monitored the network  
601 performance for the training and validation data sets until the point at which the network  
602 performance on the training data set began to degrade compared to the validation dataset. This  
603 process was used to identify the optimal number of iterations (epochs = 300) for the training  
604 process. The last trained network was designated as the best possible model to perform both  
605 translation and classification tasks. We then used a holdout test dataset and calculated MSE (Eq.  
606 10),  $R^2\_score$  (Eqs. 16-17 below) and the error in prediction for adult-CM  $APD_{90}$  as evaluation  
607 metrics to assess the performance of the network for translation task and the area under the  
608 receiver operating characteristic (AUROC) curve, accuracy, recall and precision to measure  
609 capability of network for classification task as described below. The network codes have been  
610 made publicly available at Clancy lab Github.  
611 ([https://github.com/ClancyLabUCD/Multitask\\_network](https://github.com/ClancyLabUCD/Multitask_network))

612

### 613 Evaluation metrics for the translation and classification tasks

614 As we discussed, we used MSE and cross-entropy loss functions for performance evaluation of  
615 translation and classification tasks. In addition to MSE, we computed  $R^2\_score$  [57] (Eqs. 16,17) to  
616 measure how close the translated adult-CM AP ( $\hat{y}_{t_i}$ ) was to the expected simulated adult-CM AP  
617 ( $y_{t_i}$ ). We compared the histogram distribution of simulated and translated adult-CM  $APD_{90}$  values  
618 and the error in  $APD_{90}$  prediction to assess the accuracy of network prediction.

$$619 \quad \bar{y}_{t_i} = \frac{1}{m} \sum_{i=1}^m \hat{y}_{t_i} \quad (16)$$

$$620 \quad R^2 = \frac{\sum_i (\hat{y}_{t_i} - \bar{y}_{t_i})}{\sum_i (y_{t_i} - \bar{y}_{t_i})} \quad (17)$$

621

622 We used AUROC to measure the capability of the model to distinguish between drug-free and  
623 drugged iPSC-CM APs [58]. AUROC is the area under the Receiver Operating Characteristic (ROC)  
624 curve, which is a plot of the false positive rate (FPR), the probability that the network classified

625 drug-free iPSC-CM APs into drugged categories (FP) (Eq. 18) versus the true positive rate (TPR) or  
626 recall, the probability that the network correctly classified drugged iPSC-CM APs into drugged  
627 category (TP) (Eq. 19). AUROC close to 1 indicated a model with a desirable measure of  
628 separability, while a poor model had AUROC near 0, which means that it had poor separability.

629

630 In addition, we used recall, accuracy, and precision to describe the performance of the network  
631 for the classification task [13], where the accuracy and precision indicated the proportion of all  
632 correct, TP + true negatives (TN), i.e., predicted drug-free APs (Eq. 20) and correct positive  
633 identifications (Eq. 21). False negatives (FN) in Eqs. 19-20 were the total number of drugged iPSC-  
634 CM APs classified as drug-free.

$$635 \text{ FPR} = \frac{FP}{FP+TN} \quad (18)$$

$$636 \text{ Recall} = \frac{TP}{TP+FN} \quad (19)$$

$$637 \text{ Accuracy} = 100 * \frac{TP + TN}{TP+TN+FP+FN} \quad (20)$$

$$638 \text{ Precision} = \frac{TP}{TP+FP} \quad (21)$$

639

640

## 641 References

642

- 643 1. Shaheen, N., et al., *Human induced pluripotent stem cell-derived cardiac cell sheets*  
644 *expressing genetically encoded voltage indicator for pharmacological and arrhythmia*  
645 *studies*. Stem cell reports, 2018. **10**(6): p. 1879-1894.  
646 <https://doi.org/10.1016/j.stemcr.2018.04.006>
- 647 2. Leyton-Mange, J.S., et al., *Rapid cellular phenotyping of human pluripotent stem cell-*  
648 *derived cardiomyocytes using a genetically encoded fluorescent voltage sensor*. Stem cell  
649 reports, 2014. **2**(2): p. 163-170. <https://doi.org/10.1016/j.stemcr.2014.01.003>
- 650 3. Sun, N., et al., *Patient-specific induced pluripotent stem cells as a model for familial*  
651 *dilated cardiomyopathy*. Sci Transl Med, 2012. **4**(130): p. 130ra47.  
652 <https://doi.org/10.1126/scitranslmed.3003552>
- 653 4. Lan, F., et al., *Abnormal calcium handling properties underlie familial hypertrophic*  
654 *cardiomyopathy pathology in patient-specific induced pluripotent stem cells*. Cell Stem  
655 Cell, 2013. **12**(1): p. 101-13. <https://doi.org/10.1016/j.stem.2012.10.010>
- 656 5. Burridge, P.W., et al., *Human induced pluripotent stem cell-derived cardiomyocytes*  
657 *recapitulate the predilection of breast cancer patients to doxorubicin-induced*  
658 *cardiotoxicity*. Nat Med, 2016. **22**(5): p. 547-56. <https://doi.org/10.1038/nm.4087>

- 659 6. Doss, M.X. and A. Sachinidis, *Current challenges of iPSC-based disease modeling and*  
660 *therapeutic implications*. Cells, 2019. **8**(5): p. 403. <https://doi.org/10.3390/cells8050403>
- 661 7. Collins, T.A., M.G. Rolf, and A. Pointon, *Current and future approaches to nonclinical*  
662 *cardiovascular safety assessment*. Drug Discovery Today, 2020.  
663 <https://doi.org/10.1016/j.drudis.2020.03.011>
- 664 8. Wu, J.C., et al., *Towards precision medicine with human iPSCs for cardiac*  
665 *channelopathies*. Circulation research, 2019. **125**(6): p. 653-658.  
666 <https://doi.org/10.1161/CIRCRESAHA.119.315209>
- 667 9. Sayed, N., C. Liu, and J.C. Wu, *Translation of human-induced pluripotent stem cells:*  
668 *from clinical trial in a dish to precision medicine*. Journal of the American College of  
669 Cardiology, 2016. **67**(18): p. 2161-2176. <http://dx.doi.org/10.1016/j.jacc.2016.01.083>
- 670 10. Matsa, E., J.H. Ahrens, and J.C. Wu, *Human induced pluripotent stem cells as a platform*  
671 *for personalized and precision cardiovascular medicine*. Physiological Reviews, 2016.  
672 **96**(3): p. 1093-1126. <https://doi.org/10.1152/physrev.00036.2015>
- 673 11. Tveito, A., et al., *Inversion and computational maturation of drug response using human*  
674 *stem cell derived cardiomyocytes in microphysiological systems*. Scientific reports, 2018.  
675 **8**(1): p. 1-14. <https://doi.org/10.1038/s41598-018-35858-7>
- 676 12. Tveito, A., et al., *Computational translation of drug effects from animal experiments to*  
677 *human ventricular myocytes*. Scientific Reports, 2020. **10**(1): p. 1-11.  
678 <https://doi.org/10.1038/s41598-020-66910-0>
- 679 13. Sube, R. and E.A. Ertel, *Cardiomyocytes Derived from Human Induced Pluripotent Stem*  
680 *Cells: An In-Vitro Model to Predict Cardiac Effects of Drugs*. Journal of Biomedical  
681 Science and Engineering, 2017. **10**(11): p. 527.  
682 <https://doi.org/10.4236/jbise.2017.1011040>
- 683 14. Navarrete, E.G., et al., *Screening drug-induced arrhythmia using human induced*  
684 *pluripotent stem cell-derived cardiomyocytes and low-impedance microelectrode arrays*.  
685 Circulation, 2013. **128**(11\_suppl\_1): p. S3-S13.  
686 <https://doi.org/10.1161/CIRCULATIONAHA.112.000570>
- 687 15. Lieu, D.K., et al., *Mechanism-based facilitated maturation of human pluripotent stem*  
688 *cell-derived cardiomyocytes*. Circ Arrhythm Electrophysiol, 2013. **6**(1): p. 191-201.  
689 <https://doi.org/10.1161/CIRCEP.111.973420>
- 690 16. Veerman, C.C., et al., *Immaturity of human stem-cell-derived cardiomyocytes in culture:*  
691 *fatal flaw or soluble problem?* Stem Cells Dev, 2015. **24**(9): p. 1035-52.  
692 <https://doi.org/10.1089/scd.2014.0533>
- 693 17. Tu, C., B.S. Chao, and J.C. Wu, *Strategies for Improving the Maturity of Human Induced*  
694 *Pluripotent Stem Cell-Derived Cardiomyocytes*. Circ Res, 2018. **123**(5): p. 512-514.  
695 <https://doi.org/10.1161/CIRCRESAHA.118.313472>
- 696 18. Blinova, K., et al., *International multisite study of human-induced pluripotent stem cell-*  
697 *derived cardiomyocytes for drug proarrhythmic potential assessment*. Cell reports, 2018.  
698 **24**(13): p. 3582-3592. <https://doi.org/10.1016/j.celrep.2018.08.079>
- 699 19. Sala, L., M. Bellin, and C.L. Mummery, *Integrating cardiomyocytes from human*  
700 *pluripotent stem cells in safety pharmacology: has the time come?* British journal of  
701 pharmacology, 2017. **174**(21): p. 3749-3765. <https://doi.org/10.1111/bph.13577>
- 702 20. Gong, J.Q. and E.A. Sobie, *Population-based mechanistic modeling allows for*  
703 *quantitative predictions of drug responses across cell types*. NPJ systems biology and  
704 applications, 2018. **4**(1): p. 1-11. <https://doi.org/10.1038/s41540-018-0047-2>

- 705 21. de Korte, T., et al., *Unlocking personalized biomedicine and drug discovery with human*  
706 *induced pluripotent stem cell–derived Cardiomyocytes: fit for purpose or forever elusive?*  
707 Annual Review of Pharmacology and Toxicology, 2020. **60**: p. 529-551.  
708 <https://doi.org/10.1146/annurev-pharmtox-010919-023309>
- 709 22. Koivumäki, J.T., et al., *Structural immaturity of human iPSC-derived cardiomyocytes: in*  
710 *silico investigation of effects on function and disease modeling*. Frontiers in physiology,  
711 2018. **9**: p. 80. <https://doi.org/10.3389/fphys.2018.00080>
- 712 23. Alhousseini, M.I., et al., *Machine Learning to Classify Intracardiac Electrical Patterns*  
713 *During Atrial Fibrillation: Machine Learning of Atrial Fibrillation*. Circulation:  
714 Arrhythmia and Electrophysiology, 2020. **13**(8): p. e008160.  
715 <https://doi.org/10.1161/CIRCEP.119.008160>
- 716 24. Rogers, A.J., et al., *Machine Learned Cellular Phenotypes Predict Outcome in Ischemic*  
717 *Cardiomyopathy*. Circulation Research, 2020.  
718 <https://doi.org/10.1161/CIRCRESAHA.120.317345>
- 719 25. Sevakula, R.K., et al., *State-of-the-Art machine learning techniques aiming to improve*  
720 *patient outcomes pertaining to the cardiovascular system*. Journal of the American Heart  
721 Association, 2020. **9**(4): p. e013924. <https://doi.org/10.1161/JAHA.119.013924>
- 722 26. Jin, Z., et al. *HeartToGo: a personalized medicine technology for cardiovascular disease*  
723 *prevention and detection*. in *2009 IEEE/NIH Life Science Systems and Applications*  
724 *Workshop*. 2009. IEEE. <https://doi.org/10.1109/LISSA.2009.4906714>
- 725 27. Trayanova, N.A., D.M. Popescu, and J.K. Shade, *Machine Learning in Arrhythmia and*  
726 *Electrophysiology*. Circulation Research, 2021. **128**(4): p. 544-566.  
727 <https://doi.org/10.1161/CIRCRESAHA.120.317872>
- 728 28. Hochreiter, S. and J. Schmidhuber, *Long short-term memory*. Neural computation, 1997.  
729 **9**(8): p. 1735-1780. <https://doi.org/10.1162/neco.1997.9.8.1735>
- 730 29. Guo, A., et al., *Predicting cardiovascular health trajectories in time-series electronic*  
731 *health records with LSTM models*. BMC Medical Informatics and Decision Making,  
732 2021. **21**(1): p. 1-10. <https://doi.org/10.1186/s12911-020-01345-1>
- 733 30. Shi, K., et al., *Contactless analysis of heart rate variability during cold pressor test using*  
734 *radar interferometry and bidirectional LSTM networks*. Scientific reports, 2021. **11**(1): p.  
735 1-13. <https://doi.org/10.1038/s41598-021-81101-1>
- 736 31. Picon, A., et al., *Mixed convolutional and long short-term memory network for the*  
737 *detection of lethal ventricular arrhythmia*. PloS one, 2019. **14**(5): p. e0216756.  
738 <https://doi.org/10.1371/journal.pone.0216756>
- 739 32. Ballinger, B., et al. *DeepHeart: semi-supervised sequence learning for cardiovascular*  
740 *risk prediction*. in *Thirty-Second AAAI Conference on Artificial Intelligence*. 2018.
- 741 33. He, R., et al., *Automatic cardiac arrhythmia classification using combination of deep*  
742 *residual network and bidirectional LSTM*. IEEE Access, 2019. **7**: p. 102119-102135.  
743 <https://doi.org/10.1109/ACCESS.2019.2931500>
- 744 34. Hou, B., et al., *LSTM Based Auto-Encoder Model for ECG Arrhythmias Classification*.  
745 IEEE Transactions on Instrumentation and Measurement, 2019.  
746 <https://doi.org/10.1109/TIM.2019.2910342>
- 747 35. Warrick, P. and M.N. Homsí. *Cardiac arrhythmia detection from ECG combining*  
748 *convolutional and long short-term memory networks*. in *2017 Computing in Cardiology*  
749 *(CinC)*. 2017. IEEE. <https://doi.org/10.22489/CinC.2017.161-460>



- 750 36. Oh, S.L., et al., *Automated diagnosis of arrhythmia using combination of CNN and LSTM*  
751 *techniques with variable length heart beats*. Computers in biology and medicine, 2018.  
752 **102**: p. 278-287. <https://doi.org/10.1016/j.compbiomed.2018.06.002>
- 753 37. Chen, C., et al., *Automated arrhythmia classification based on a combination network of*  
754 *CNN and LSTM*. Biomedical Signal Processing and Control, 2020. **57**: p. 101819.  
755 <https://doi.org/10.1016/j.bspc.2019.101819>
- 756 38. Wang, L. and X. Zhou, *Detection of congestive heart failure based on LSTM-based deep*  
757 *network via short-term RR intervals*. Sensors, 2019. **19**(7): p. 1502.  
758 <https://doi.org/10.3390/s19071502>
- 759 39. Bian, M., et al. *An accurate lstm based video heart rate estimation method*. in *Chinese*  
760 *Conference on Pattern Recognition and Computer Vision (PRCV)*. 2019. Springer.  
761 [https://doi.org/10.1007/978-3-030-31726-3\\_35](https://doi.org/10.1007/978-3-030-31726-3_35)
- 762 40. Maragatham, G. and S. Devi, *LSTM model for prediction of heart failure in big data*.  
763 *Journal of medical systems*, 2019. **43**(5): p. 1-13. [https://doi.org/10.1007/s10916-019-](https://doi.org/10.1007/s10916-019-1243-3)  
764 [1243-3](https://doi.org/10.1007/s10916-019-1243-3)
- 765 41. Yildirim, O., et al., *A new approach for arrhythmia classification using deep coded*  
766 *features and LSTM networks*. Computer methods and programs in biomedicine, 2019.  
767 **176**: p. 121-133. <https://doi.org/10.1016/j.cmpb.2019.05.004>
- 768 42. Wang, E.K., X. Zhang, and L. Pan, *Automatic classification of CAD ECG signals with*  
769 *SDAE and bidirectional long short-term network*. IEEE Access, 2019. **7**: p. 182873-  
770 182880. <https://doi.org/10.1109/ACCESS.2019.2936525>
- 771 43. Martis, R.J., et al., *Application of higher order cumulant features for cardiac health*  
772 *diagnosis using ECG signals*. International journal of neural systems, 2013. **23**(04): p.  
773 1350014. <https://doi.org/10.1142/S0129065713500147>
- 774 44. Liu, F., et al. *A LSTM and CNN based assemble neural network framework for*  
775 *arrhythmias classification*. in *ICASSP 2019-2019 IEEE International Conference on*  
776 *Acoustics, Speech and Signal Processing (ICASSP)*. 2019. IEEE.  
777 <https://doi.org/10.1109/ICASSP.2019.8682299>
- 778 45. Yildirim, Ö., *A novel wavelet sequence based on deep bidirectional LSTM network model*  
779 *for ECG signal classification*. Computers in biology and medicine, 2018. **96**: p. 189-202.  
780 <https://doi.org/10.1016/j.compbiomed.2018.03.016>
- 781 46. Yang, P.-C., et al., *A computational pipeline to predict cardiotoxicity: From the atom to*  
782 *the rhythm*. Circulation research, 2020. **126**(8): p. 947-964.  
783 <https://doi.org/10.1161/CIRCRESAHA.119.316404>
- 784 47. Cai, C., et al., *Deep learning-based prediction of drug-induced cardiotoxicity*. Journal of  
785 *chemical information and modeling*, 2019. **59**(3): p. 1073-1084.  
786 <https://doi.org/10.1021/acs.jcim.8b00769>
- 787 48. Zhang, Y., et al., *Prediction of hERG K<sup>+</sup> channel blockage using deep neural networks*.  
788 *Chemical Biology & Drug Design*, 2019. **94**(5): p. 1973-1985.  
789 <https://doi.org/10.1111/cbdd.13600>
- 790 49. Dickson, C.J., C. Velez-Vega, and J.S. Duca, *Revealing molecular determinants of hERG*  
791 *blocker and activator binding*. Journal of chemical information and modeling, 2019.  
792 **60**(1): p. 192-203. <https://doi.org/10.1021/acs.jcim.9b00773>
- 793 50. Ryu, J.Y., et al., *DeepHIT: a deep learning framework for prediction of hERG-induced*  
794 *cardiotoxicity*. Bioinformatics, 2020. **36**(10): p. 3049-3055.  
795 <https://doi.org/10.1093/bioinformatics/btaa075>

- 796 51. Li, Z., et al., *General principles for the validation of proarrhythmia risk prediction*  
797 *models: an extension of the CiPA in silico strategy*. *Clinical Pharmacology &*  
798 *Therapeutics*, 2020. **107**(1): p. 102-111. <https://doi.org/10.1002/cpt.1647>
- 799 52. Kernik, D.C., et al., *A computational model of induced pluripotent stem-cell derived*  
800 *cardiomyocytes incorporating experimental variability from multiple data sources*. *The*  
801 *Journal of physiology*, 2019. <https://doi.org/10.1113/JP277724>
- 802 53. O'Hara, T., et al., *Simulation of the undiseased human cardiac ventricular action*  
803 *potential: model formulation and experimental validation*. *PLoS computational biology*,  
804 2011. **7**(5): p. e1002061. <https://doi.org/10.1371/journal.pcbi.1002061>
- 805 54. Goodfellow, I., Y. Bengio, and A. Courville, *Deep learning*. 2016: MIT press.  
806 <https://doi.org/10.4258/hir.2016.22.4.351>
- 807 55. Tanskanen, A.J. and L.H. Alvarez, *Voltage noise influences action potential duration in*  
808 *cardiac myocytes*. *Mathematical biosciences*, 2007. **208**(1): p. 125-146.  
809 <https://doi.org/10.1016/j.mbs.2006.09.023>
- 810 56. Gustafsson, F., *Determining the initial states in forward-backward filtering*. *IEEE*  
811 *Transactions on signal processing*, 1996. **44**(4): p. 988-992.  
812 <https://doi.org/10.1109/78.492552>
- 813 57. Devore, J.L., *Probability and Statistics for Engineering and the Sciences*. 2011: Cengage  
814 learning.
- 815 58. Fawcett, T., *An introduction to ROC analysis*. *Pattern recognition letters*, 2006. **27**(8): p.  
816 861-874. <https://doi.org/10.1016/j.patrec.2005.10.010>
- 817 59. Powers, D.M., *Evaluation: from precision, recall and F-measure to ROC, informedness,*  
818 *markedness and correlation*. 2011.
- 819 60. LeCun, Y., J. Denker, and S. Solla, *Optimal brain damage*. *Advances in neural*  
820 *information processing systems*, 1989. **2**: p. 598-605.
- 821 61. Reale, R.A., J.F. Brugge, and J.C. Chan, *Maps of auditory cortex in cats reared after*  
822 *unilateral cochlear ablation in the neonatal period*. *Developmental Brain Research*,  
823 1987. **34**(2): p. 281-290. [https://doi.org/10.1016/0165-3806\(87\)90215-X](https://doi.org/10.1016/0165-3806(87)90215-X)
- 824 62. Yang, P.C., et al., *A computational modelling approach combined with cellular*  
825 *electrophysiology data provides insights into the therapeutic benefit of targeting the late*  
826 *Na<sup>+</sup> current*. *The Journal of physiology*, 2015. **593**(6): p. 1429-1442.  
827 <https://doi.org/10.1113/jphysiol.2014.279554>
- 828 63. Fabbri, A., et al., *Required GK1 to suppress automaticity of iPSC-CMs depends strongly*  
829 *on IK1 model structure*. *Biophysical Journal*, 2019. **117**(12): p. 2303-2315.  
830 <https://doi.org/10.1016/j.bpj.2019.08.040>
- 831 64. Casini, S., A.O. Verkerk, and C.A. Remme, *Human iPSC-derived cardiomyocytes for*  
832 *investigation of disease mechanisms and therapeutic strategies in inherited arrhythmia*  
833 *syndromes: strengths and limitations*. *Cardiovascular drugs and therapy*, 2017. **31**(3): p.  
834 325-344. <https://doi.org/10.1007/s10557-017-6735-0>
- 835 65. Goversen, B., et al., *The immature electrophysiological phenotype of iPSC-CMs still*  
836 *hampers in vitro drug screening: Special focus on IK1*. *Pharmacology & therapeutics*,  
837 2018. **183**: p. 127-136. <https://doi.org/10.1016/j.pharmthera.2017.10.001>
- 838 66. Knollmann, B.C., *Induced pluripotent stem cell-derived cardiomyocytes: Boutique*  
839 *science or valuable arrhythmia model?* *Circulation research*, 2013. **112**(6): p. 969-976.  
840 <https://doi.org/10.1161/CIRCRESAHA.112.300567>

- 841 67. Sinnecker, D., et al., *Induced pluripotent stem cell-derived cardiomyocytes: a versatile*  
842 *tool for arrhythmia research*. Circulation Research, 2013. **112**(6): p. 961-968.  
843 <https://doi.org/10.1161/CIRCRESAHA.112.268623>
- 844 68. Blinova, K., et al., *Comprehensive translational assessment of human-induced*  
845 *pluripotent stem cell derived cardiomyocytes for evaluating drug-induced arrhythmias*.  
846 Toxicological Sciences, 2017. **155**(1): p. 234-247. <https://doi.org/10.1093/toxsci/kfw200>
- 847 69. Kernik, D.C., et al., *A computational model of induced pluripotent stem-cell derived*  
848 *cardiomyocytes for high throughput risk stratification of KCNQ1 genetic variants*. PLOS  
849 Computational Biology, 2020. **16**(8): p. e1008109.  
850 <https://doi.org/10.1371/journal.pcbi.1008109>
- 851 70. Yoshinaga, D., et al., *Phenotype-based high-throughput classification of long QT*  
852 *syndrome subtypes using human induced pluripotent stem cells*. Stem cell reports, 2019.  
853 **13**(2): p. 394-404. <https://doi.org/10.1016/j.stemcr.2019.06.007>
- 854 71. Atkinson, K.E., *An introduction to numerical analysis*. 2008: John Wiley & sons.
- 855 72. Yang, P.C., et al., *A Computational Pipeline to Predict Cardiotoxicity: From the Atom to*  
856 *the Rhythm*. Circ Res, 2020. **126**(8): p. 947-964.  
857 <https://doi.org/10.1161/CIRCRESAHA.119.316404>
- 858 73. Li, M., et al., *Overexpression of KCNJ2 in induced pluripotent stem cell-derived*  
859 *cardiomyocytes for the assessment of QT-prolonging drugs*. Journal of Pharmacological  
860 Sciences, 2017. **134**(2): p. 75-85. <https://doi.org/10.1016/j.jphs.2017.05.004>
- 861 74. Cheng, J., L. Dong, and M. Lapata, *Long short-term memory-networks for machine*  
862 *reading*. arXiv preprint arXiv:1601.06733, 2016.
- 863 75. Olah, C., *Understanding LSTM Networks*. Aug. 2015. URL <https://colah.github.io/posts/2015-08-Understanding-LSTMs>, 2017.
- 865 76. Krogh, A., *What are artificial neural networks?* Nature biotechnology, 2008. **26**(2): p.  
866 195-197. <https://doi.org/10.1038/nbt1386>
- 867 77. Carugo, O., F. Eisenhaber, and Carugo, *Data mining techniques for the life sciences*. Vol.  
868 609. 2010: Springer. <https://doi.org/10.1007/978-1-4939-3572-7>
- 869 78. Murphy, K.P., *Machine learning: a probabilistic perspective*. 2012: MIT press.
- 870 79. Kingma, D.P. and J. Ba, *Adam: A method for stochastic optimization*. arXiv preprint  
871 arXiv:1412.6980, 2014.
- 872 80. Glorot, X., A. Bordes, and Y. Bengio. *Deep sparse rectifier neural networks*. in  
873 *Proceedings of the fourteenth international conference on artificial intelligence and*  
874 *statistics*. 2011. JMLR Workshop and Conference Proceedings.
- 875 81. Zaremba, W., I. Sutskever, and O. Vinyals, *Recurrent neural network regularization*.  
876 arXiv preprint arXiv:1409.2329, 2014.
- 877 82. Ketkar, N., *Introduction to pytorch*, in *Deep learning with python*. 2017, Springer. p.  
878 195-208. [https://doi.org/10.1007/978-1-4842-2766-4\\_12](https://doi.org/10.1007/978-1-4842-2766-4_12)
- 879
